# Supplementary material
Source: MDPI journal article supplement (https://www.mdpi.com/2077-0472/11/8/792)
Supplement: s1 [file s1]

**Supplementary Table 1.** Tomato accessions for the evaluation of physiological traits against low temperature in winter 2020-2021.

| No  | Origin name         | Species                                              | Field number | Fruit type |
|-----|---------------------|------------------------------------------------------|--------------|------------|
| T01 | IT173771            | <i>Solanum peruvianum</i>                            | WTM23        | Wild       |
| T02 | L3708               | <i>Solanum pimpinellifolium</i>                      | WTM24        | Wild       |
| T03 | MEX-SBY-1997-2799   | <i>Solanum lycopersicum</i> var. <i>lycopersicum</i> | WTM02        | Cherry     |
| T04 | K160289             | <i>Solanum lycopersicum</i> var. <i>lycopersicum</i> | WTM09        | Cherry     |
| T05 | Wonye 9014          | <i>Solanum lycopersicum</i> var. <i>lycopersicum</i> | WTM10        | Cherry     |
| T06 | VI037163            | <i>Solanum lycopersicum</i> var. <i>lycopersicum</i> | WTM11        | Cherry     |
| T07 | SY x 11AVT-2_4 (F9) | <i>Solanum lycopersicum</i> var. <i>lycopersicum</i> | WTM12        | Cherry     |
| T08 | Wonye 9015          | <i>Solanum lycopersicum</i> var. <i>lycopersicum</i> | WTM13        | Cherry     |
| T09 | AVTO1020            | <i>Solanum lycopersicum</i> var. <i>lycopersicum</i> | WTM14        | Cherry     |
| T10 | T088-47             | <i>Solanum lycopersicum</i> var. <i>lycopersicum</i> | WTM15        | Cherry     |
| T11 | Power Guard         | <i>Solanum lycopersicum</i> var. <i>lycopersicum</i> | WTM16        | Cherry     |
| T12 | T088-43             | <i>Solanum lycopersicum</i> var. <i>lycopersicum</i> | WTM17        | Cherry     |
| T13 | ACC416              | <i>Solanum lycopersicum</i> var. <i>lycopersicum</i> | WTM18        | Cherry     |
| T14 | Yulwon              | <i>Solanum lycopersicum</i> var. <i>lycopersicum</i> | WTM20        | Cherry     |
| T15 | SWEETIE             | <i>Solanum lycopersicum</i> var. <i>lycopersicum</i> | WTM21        | Cherry     |
| T16 | ACC440              | <i>Solanum lycopersicum</i> var. <i>lycopersicum</i> | WTM22        | Cherry     |
| T17 | Minichal            | <i>Solanum lycopersicum</i> var. <i>lycopersicum</i> | WTM30        | Cherry     |
| T18 | Candy Plus          | <i>Solanum lycopersicum</i> var. <i>lycopersicum</i> | WTM31        | Cherry     |
| T19 | TY Sispen           | <i>Solanum lycopersicum</i> var. <i>lycopersicum</i> | WTM32        | Cherry     |
| T20 | Black Cue           | <i>Solanum lycopersicum</i> var. <i>lycopersicum</i> | WTM33        | Cherry     |
| T21 | Icon513             | <i>Solanum lycopersicum</i> var. <i>lycopersicum</i> | WTM34        | Cherry     |
| T22 | TY Endorphin        | <i>Solanum lycopersicum</i> var. <i>lycopersicum</i> | WTM35        | Cherry     |
| T23 | AVTO1314            | <i>Solanum lycopersicum</i> var. <i>lycopersicum</i> | WTM03        | Medium     |
| T24 | AVTO1219            | <i>Solanum lycopersicum</i> var. <i>lycopersicum</i> | WTM04        | Medium     |
| T25 | K012912             | <i>Solanum lycopersicum</i> var. <i>lycopersicum</i> | WTM05        | Medium     |
| T26 | L05945              | <i>Solanum lycopersicum</i> var. <i>lycopersicum</i> | WTM06        | Medium     |
| T27 | AVTO1456            | <i>Solanum lycopersicum</i> var. <i>lycopersicum</i> | WTM07        | Medium     |
| T28 | B-strong            | <i>Solanum lycopersicum</i> var. <i>lycopersicum</i> | WTM08        | Medium     |
| T29 | ACC417              | <i>Solanum lycopersicum</i> var. <i>lycopersicum</i> | WTM19        | Medium     |
| T30 | Hoyoung             | <i>Solanum lycopersicum</i> var. <i>lycopersicum</i> | WTM28        | Medium     |
| T31 | Black Change        | <i>Solanum lycopersicum</i> var. <i>lycopersicum</i> | WTM29        | Medium     |
| T32 | Tom Little          | <i>Solanum lycopersicum</i> var. <i>lycopersicum</i> | WTM25        | Medium     |
| T33 | Tom Heart           | <i>Solanum lycopersicum</i> var. <i>lycopersicum</i> | WTM26        | Medium     |
| T34 | AVTO9001            | <i>Solanum lycopersicum</i> var. <i>lycopersicum</i> | WTM01        | Large      |
| T35 | Dafnis              | <i>Solanum lycopersicum</i> var. <i>lycopersicum</i> | WTM27        | Large      |

**Supplementary Table 2.** Loading matrix associated with the principal components analysis (PCA) for 9 physiological traits.

| Value             | PC1         | PC2         | PC3         | PC4         | PC5         | PC6         | PC7    | PC8    | PC9     |
|-------------------|-------------|-------------|-------------|-------------|-------------|-------------|--------|--------|---------|
| Eigenvalue        | 3.692       | 2.396       | 1.142       | .799        | .452        | .220        | .139   | .099   | .060    |
| Variability (%)   | 41.024      | 26.626      | 12.683      | 8.877       | 5.027       | 2.449       | 1.542  | 1.100  | .671    |
| Cumulative (%)    | 41.024      | 67.650      | 80.333      | 89.210      | 94.237      | 96.687      | 98.228 | 99.329 | 100.000 |
| Component loading |             |             |             |             |             |             |        |        |         |
| LL                | <b>.941</b> | .144        | .114        | .016        | .122        | .084        | -.011  | -.243  | .000    |
| LW                | <b>.939</b> | .023        | .041        | -.024       | .202        | .112        | .040   | .246   | .012    |
| FS                | .041        | <b>.932</b> | .306        | -.020       | .145        | -.081       | .014   | -.014  | -.094   |
| NFR               | .074        | <b>.746</b> | .288        | .479        | .217        | -.077       | .045   | .008   | .264    |
| MY                | .060        | .222        | <b>.967</b> | .013        | -.033       | .005        | -.105  | -.012  | .006    |
| FY                | .142        | <b>.391</b> | <b>.765</b> | .262        | .167        | .056        | .375   | .015   | .018    |
| NFL               | -.025       | .086        | .079        | <b>.986</b> | .118        | .006        | .021   | -.002  | -.003   |
| PH                | .294        | .225        | .033        | .165        | <b>.909</b> | .086        | .022   | .003   | .010    |
| SD                | <b>.659</b> | -.196       | .054        | -.003       | .160        | <b>.706</b> | .012   | .002   | -.006   |
